# Supplementary material
Source: publisher site journal article supplement (https://www.dovepress.com/article/581084)
Supplement: Supplementary file 1 [file 581084%20Revised%20supplementary_1.docx]

**Statistical Details of the Generalized Estimating Equations Model**

This study employed Generalized Estimating Equations (GEE) to analyze longitudinally repeated outcome measures, including QoR-15, NRS, and OBAS scores. A key advantage of the GEE methodology is that, when combined with robust (sandwich) standard errors, the estimated regression coefficients remain consistent and statistical inferences valid, even if the pre-specified working correlation structure does not perfectly match the true correlation in the data.

An *Independent* structure was specified as the *Working Correlation Matrix*. Given that the repeated measurements in this study were taken at intervals spanning several hours to days, any potential serial correlation is likely weak. Employing this simplified "*independent*" structure, which does not presuppose strong correlations, represents a conservative and robust strategy. It ensures that the validity of our conclusions does not depend on a potentially incorrect specification of a more complex correlation structure. All analyses applied robust (sandwich) standard errors, implemented via the *Robust estimator* in the GEE module of SPSS software (Table S2).

The GEE analyses were performed using SPSS version 27.0 (IBM Corp., Armonk, NY, USA). The outcome variables QoR-15, NRS, and OBAS are continuous. In the GEE model, the patient *ID* was specified as the *subject variable*, and *Time* was included as the *within-subject variable*. Accordingly, the model type was specified as *Linear*, utilizing an *Identity* link function and a *Normal distribution* as the working distribution. The *scale parameter method* was set to *Maximum likelihood estimate*. For multiple comparisons of marginal means, the *Bonferroni* method was applied. The model terms included the main effects of Group and Time, as well as their Group × Time interaction effect.

Although the distributions of OBAS and NRS scores may deviate from normality, the GEE framework, in conjunction with robust standard errors, is known to be robust to such misspecification of the distributional assumption.

Table S1 Baseline and Intraoperative Characteristics of the Intention-to-Treat and Modified Intention-to-Treat Analysis Sets

|  | Intention-to-Treat set | | | *P* value | modified Intention-to-Treat set | | | *P* value |
| --- | --- | --- | --- | --- | --- | --- | --- | --- |
|  | Group TPVB (n=29) | Group ESPB (n=29) | Group Control (n=29) | Group TPVB (n=29) | Group ESPB (n=28) | Group Control (n=29) |
| Sex, n (%) |  |  |  | 0.573 |  |  |  | 0.654 |
| Male | 18 (62.07%) | 15 (51.72%) | 16 (55.17%) |  | 18 (62.07%) | 14 (50.00%) | 16 (55.17%) |  |
| Female | 11 (37.93%) | 14 (48.28%) | 13 (42.83%) |  | 11 (37.93%) | 14 (50.00%) | 13 (42.83%) |  |
| Age (year) | 59.55 ± 9.01 | 61.07 ± 11.30 | 62.17 ± 9.98 | 0.623 | 59.55 ± 9.01 | 61.18 ± 11.49 | 62.17 ± 9.98 | 0.623 |
| ASA, n (%) |  |  |  | 0.087 |  |  |  | 0.088 |
| II | 23 (79.31%) | 19 (65.52%) | 15 (51.72%) |  | 23 (79.31%) | 18 (64.29%) | 15 (51.72%) |  |
| III | 6 (20.69%) | 10 (34.48%) | 14 (48.28%) |  | 6 (20.69%) | 10 (35.71%) | 14 (48.28%) |  |
| Weight (kg) | 65.00 (61.50, 75.00) | 65.00 (60.00, 70.00) | 63.00 (56.00, 68.00) | 0.161 | 65.00 (61.50, 75.00) | 65.00 (60.00, 70.00) | 63.00 (56.00, 68.00) | 0.163 |
| Height (m) | 1.66 (1.60, 1.71) | 1.62 (1.58, 1.71) | 1.64 (1.56, 1.70) | 0.814 | 1.66 (1.60, 1.71) | 1.65 (1.58, 1.71) | 1.64 (1.56, 1.70) | 0.814 |
| BMI (kg/m2) | 25.39 (23.03, 26.62) | 24.34 (22.89, 26.56) | 23.31 (21.80, 24.97) | 0.088 | 25.39 (23.03, 26.62) | 24.34 (22.89, 26.56) | 23.31 (21.80, 24.97) | 0.094 |
| Type of surgery, n (%) |  |  |  | 0.167 |  |  |  | 0.169 |
| Left hemicolectomy | 9 (31.04%) | 4 (13.79%) | 2 (6.90%) |  | 9 (31.04%) | 4 (14.29%) | 2 (6.90%) |  |
| Right hemicolectomy | 5 (17.24%) | 4 (13.79%) | 5 (17.24%) |  | 5 (17.24%) | 4 (14.29%) | 5 (17.24%) |  |
| Sigmoid resection | 5 (17.24%) | 6 (20.69%) | 3 (10.34%) |  | 5 (17.24%) | 6 (21.42%) | 3 (10.34%) |  |
| Radical resection of rectal carcinoma | 10 (34.48%) | 15 (51.73%) | 19 (65.52%) |  | 10 (34.48%) | 14 (50.00%) | 19 (65.52%) |  |
| Neoadjuvant chemotherapy, n (%) |  |  |  | 0.340 |  |  |  | 0.361 |
| Yes | 5 (17.24%) | 5 (17.24%) | 9 (31.03%) |  | 5 (17.24%) | 5 (17.86%) | 9 (31.03%) |  |
| No | 24 (82.76%) | 24 (82.76%) | 20 (68.97%) |  | 24 (82.76%) | 23 (82.14%) | 20 (68.97%) |  |
| Duration of surgery (min) | 174.31 ± 41.98 | 173.72 ± 37.56 | 184.14 ± 37.51 | 0.532 | 174.31 ± 41.98 | 174.21 ± 38.13 | 184.14 ± 37.51 | 0.554 |
| Duration of anesthesia (min) | 201.69 ± 39.64 | 203.31 ± 34.87 | 214.62 ± 37.59 | 0.370 | 201.69 ± 39.64 | 204.14 ± 35.21 | 214.62 ± 37.59 | 0.392 |
| Total loss of blood (ml) | 50 (50, 100) | 50 (30, 100) | 50 (50, 100) | 0.071 | 50 (50, 100) | 50 (30, 50) | 50 (50, 100) | 0.052 |
| Infusion volume (ml) | 2000 (1600, 2100) | 2100 (1600, 2200) | 2100 (1600, 2100) | 0.861 | 2000 (1600, 2100) | 2100 (1600, 2200) | 2100 (1600, 2100) | 0.787 |
| Intraoperative blood transfusion, n (%) |  |  |  | 0.106 |  |  |  | 0.121 |
| Yes | 7 (24.14%) | 5 (17.24%) | 11 (37.93%) |  | 7 (24.14%) | 5 (17.86%) | 11 (37.93%) |  |
| No | 22 (75.86%) | 24 (82.76%) | 18 (62.07%) |  | 22 (75.86%) | 23 (82.14%) | 18 (62.07%) |  |
| Preoperative QoR-15 scores | 139.69 ± 2.33 | 139.72 ± 2.45 | 138.41 ± 2.28 | 0.064 | 139.69 ± 2.33 | 139.64 ± 2.45 | 138.41 ± 2.28 | 0.076 |
| Comorbidities, n (%) |  |  |  |  |  |  |  |  |
| Hypertension | 10 (34.48%) | 14 (48.27%) | 11 (37.93%) | 0.537 | 10 (34.48%) | 13 (46.43%) | 11 (37.93%) | 0.638 |
| Diabetes | 5 (17.24%) | 6 (20.69%) | 9 (31.03%) | 0.430 | 5 (17.24%) | 6 (21.43%) | 9 (31.03%) | 0.444 |
| Coronary artery disease | 1 (3.45%) | 0 (0%) | 2 (6.90%) | 1 | 1 (3.45%) | 0 (0%) | 2 (6.90%) | 1 |
| Cerebrovascular disease | 3 (10.34%) | 2 (6.90%) | 5 (17.24%) | 0.453 | 3 (10.34%) | 2 (7.14%) | 5 (17.24%) | 0.476 |
| Anemia | 8 (27.59%) | 11 (37.93%) | 12 (41.38%) | 0.521 | 8 (27.59%) | 11 (39.29%) | 12 (41.38%) | 0.500 |
| Preoperative CRP (mg/L) | 2.00 (2.00, 3.00) | 2.60 (2.00, 3.20) | 2.30 (1.60, 3.10) | 0.156 | 2.00 (2.00, 3.00) | 2.60 (2.00, 3.20) | 2.30 (1.60, 3.10) | 0.210 |
| Intraoperative sufentanil consumption (μg) | 30.86 ± 3.73 | 31.25 ± 3.17 a | 32.24 ± 3.85 | 0.340 | 30.86 ± 3.73 | 31.25 ± 3.17 | 32.24 ± 3.85 | 0.340 |
| Intraoperative remifentanil consumption (μg) | 1334.05 ± 150.43 | 1411.25 ± 150.65 a | 1535.52 ± 176.88 | <0.001 | 1334.05 ± 150.43 | 1411.25 ± 150.65 | 1535.52 ± 176.88 | <0.001 |
| ΔMAP (mmHg) | 8.00 (6.00, 9.33) | 9.00 (8.00, 10.33) a | 14.67 (13.00, 18.00) | <0.001 | 8.00 (6.00, 9.33) | 9.00 (8.00, 10.33) | 14.67 (13.00, 18.00) | <0.001 |
| ΔHR (bpm) | 8.00 (7.00, 9.00) | 10.00 (8.00, 11.00) a | 14.00 (13.00, 16.00) | <0.001 | 8.00 (7.00, 9.00) | 10.00 (8.00, 11.00) | 14.00 (13.00, 16.00) | <0.001 |

*Values are presented as mean ± standard deviation, median (interquartile range) or number (percentage).*

*a:* *one patient in the ESPB group (intention-to-treat set) was excluded due to block failure and thus no intraoperative indicators were collected, the intraoperative data presented are identical for the intention-to-treat and modified intention-to-treat sets.*

*ΔMAP and ΔHR were calculated as the value after skin incision minus the value before skin incision.*

*Abbreviations: ASA, American Society of Anesthesiologists; BMI, Body Mass Index; CRP: C-reactive Protein; ESPB: Erector Spinae Plane Block; HR: Heart Rate; MD: Mean Difference; QoR-15, Quality of Recovery-15; TPVB: Thoracic Paravertebral Block.*

Table S2 QoR-15, NRS and OBAS scores

|  | Group TPVB (n=29) | Group ESPB (n=28) | Group Control (n=28) | Group TPVB vs Group ESPB  MD (95%CI) | Robust standard errors | *Adj P* value a | Group TPVB vs Group Control  MD (95%CI) | Robust standard errors | *Adj P* value a | Group ESPB vs Group Control  MD (95%CI) | Robust standard errors | *Adj P* value a |  |
| --- | --- | --- | --- | --- | --- | --- | --- | --- | --- | --- | --- | --- | --- |
| QoR-15 |  |  |  |  |  |  |  |  |  |  |  |  |  |
| 24h | 122.03 ± 4.00 | 119.00 ± 3.09 | 109.79 ± 2.89 | 3.03 (0.09, 5.98) | 0.923 | 0.036 | 12.25 (9.37, 15.12) | 0.899 | <0.001 | 9.21 (6.71, 11.72) | 0.785 | <0.001 |  |
| 48h | 128.14 ± 3.64 | 126.26 ± 2.61 | 118.68 ± 2.71 | 1.89 (-0.74, 4.52) | 0.822 | 0.778 | 9.46 (6.80, 12.12) | 0.833 | <0.001 | 7.57 (5.34, 9.80) | 0.697 | <0.001 |  |
| 72h | 132.38 ± 3.18 | 131.64 ± 2.63 | 129.71 ± 3.29 | 0.74 (-1.29, 3.16) | 0.758 | 1 | 2.67 (-0.03, 5.36) | 0.842 | 0.056 | 1.93 (-0.57, 4.43) | 0.781 | 0.487 |  |
| OBAS |  |  |  |  |  |  |  |  |  |  |  |  |  |
| 24h | 5.00 (4.00, 6.00) | 6.00 (5.00, 6.00) | 7.00 (6.00, 7.00) | -0.72 (-1.36, -0.08) | 0.200 | 0.012 | -1.65 (-2.36, -0.94) | 0.222 | <0.001 | -0.93 (-1.57, -0.29) | 0.200 | <0.001 |  |
| 48h | 3.00 (3.00, 4.00) | 4.00 (3.00, 4.00) | 4.50 (4.00, 5.00) | -0.54 (-1.07, -0.02) | 0.164 | 0.034 | -1.15 (-1.75, -0.55) | 0.187 | <0.001 | -0.61 (-1.19, -0.03) | 0.181 | 0.030 |  |
| 72h | 2.00 (2.00, 2.00) | 2.00 (2.00, 2.00) | 2.00 (2.00, 3.00) | -0.07 (-0.62, 0.48) | 0.171 | 1 | -0.32 (-0.85, 0.21) | 0.167 | 1 | -0.25 (-0.77, 0.27) | 0.162 | 1 |  |
| NRS score at rest |  |  |  |  |  |  |  |  |  |  |  |  |  |
| 1h | 2.00 (2.00, 2.00) | 2.00 (2.00, 3.00) | 3.00 (2.00, 3.00) | -0.14 (-0.73, 0.45) | 0.175 | 1 | -0.64 (-1.26, -0.03) | 0.182 | 0.027 | -0.50 (-1.07, 0.07) | 0.168 | 0.196 |  |
| 6h | 3.00 (3.00, 4.00) | 4.00 (4.00, 4.00) | 5.00 (4.00, 5.00) | -0.51 (-0.98, -0.05) | 0.137 | 0.012 | -1.26 (-1.88, -0.64) | 0.184 | <0.001 | -0.75 (-1.30, -0.20) | 0.164 | <0.001 |  |
| 24h | 3.00 (3.00, 3.00) | 3.00 (2.50, 3.00) | 3.00 (3.00, 3.00) | 0.01 (-0.52, 0.54) | 0.157 | 1 | -0.24 (-0.80, 0.31) | 0.164 | 1 | -0.25 (-0.76, 0.26) | 0.151 | 1 |  |
| 48h | 2.00 (1.00, 2.00) | 2.00 (2.00, 2.00) | 2.00 (2.00, 2.50) | -0.21 (-0.72, 0.31) | 0.152 | 1 | -0.31 (-0.84, 0.21) | 0.155 | 1 | -0.11 (-0.65, 0.44) | 0.162 | 1 |  |
| NRS score at movement |  |  |  |  |  |  |  |  |  |  |  |  |  |
| 1h | 3.00 (3.00, 3.00) | 3.00 (3.00, 3.00) | 4.00 (3.00, 4.00) | -0.17 (-0.55, 0.21) | 0.113 | 1 | -0.89 (-1.37, -0.40) | 0.144 | <0.001 | -0.71 (-1.20, -0.23) | 0.144 | <0.001 |  |
| 6h | 5.00 (4.00, 5.00) | 5.00 (5.00, 5.00) | 6.00 (5.50, 6.00) | -0.42 (-0.88, 0.05) | 0.138 | 0.173 | -1.27 (-1.84, -0.70) | 0.170 | <0.001 | -0.86 (-1.30, -0.41) | 0.132 | <0.001 |  |
| 24h | 3.00 (2.00, 3.00) | 3.00 (2.00, 3.00) | 3.00 (3.00, 4.00) | -0.17 (-0.84, 0.51) | 0.200 | 1 | -0.70 (-1.38, -0.02) | 0.201 | 0.032 | -0.54 (-1.18, 0.11) | 0.191 | 0.329 |  |
| 48h | 2.00 (2.00, 2.00) | 2.00 (2.00, 2.00) | 2.00 (2.00, 3.00) | -0.14 (-0.60, 0.32) | 0.137 | 1 | -0.35 (-0.86, 0.16) | 0.151 | 1 | -0.21 (-0.77, 0.34) | 0.164 | 1 |  |

*Values are presented as mean ± standard deviation or median (IQR).*

*a: P-value adjusted by Bonferroni method.*

*Comparisons were analyzed using generalized estimating equations (GEE). Working Correlation Matrix is Independent.*

*Abbreviations: CI: Confidence Interval; MD: Mean Difference; NRS: Numerical Rating Scale; OBAS: Overall Benefit of Analgesic Score; QoR-15, Quality of Recovery-15.*

Table S3 Adverse events

|  | Group TPVB (n=29) | Group ESPB (n=28) | Group Control (n=28) | *P* value |
| --- | --- | --- | --- | --- |
| Hypotension | 1 (3.45%) | 1 (3.57%) | 4 (14.29%) | 0.190 |
| Hematoma | 0 (0%) | 0 (0%) | 0 (0%) | NA |
| Pneumothorax | 0 (0%) | 0 (0%) | 0 (0%) | NA |
| Intrathecal injection | 0 (0%) | 0 (0%) | 0 (0%) | NA |
| Local anesthetic toxicity | 0 (0%) | 0 (0%) | 0 (0%) | NA |
| Hypothermia | 1 (3.45%) | 0 (0%) | 0 (0%) | 0.376 |
| Pruritus | 0 (0%) | 0 (0%) | 2 (7.14%) | 0.124 |
| PONV | 4 (13.79%) a | 8 (28.57%) | 13 (46.43%) | 0.026 |

*Values are presented as number (percentage).*

*a* *Adj-P = 0.029 compared with Group Control, determined by pairwise Fisher’s exact test with Bonferroni correction for multiple comparisons.*

*Abbreviations: PONV: Postoperative Nausea and Vomiting*

Table S4 Surgery type-adjusted QoR-15 at postoperative time points.

|  | Group TPVB (n=29) | Group ESPB (n=28) | Group Control (n=28) | Group TPVB vs Group ESPB  MD (95%CI) | Robust standard errors | *Adj P* value a | Group TPVB vs Group Control  MD (95%CI) | Robust standard errors | *Adj P* value a | Group ESPB vs Group Control  MD (95%CI) | Robust standard errors | *Adj P* value a |  |
| --- | --- | --- | --- | --- | --- | --- | --- | --- | --- | --- | --- | --- | --- |
| QoR-15 (adjusted) b |  |  |  |  |  |  |  |  |  |  |  |  |  |
| 24h | 122.03 ± 4.00 | 119.00 ± 3.09 | 109.79 ± 2.89 | 3.12 (0.05, 6.20) | 0.962 | 0.042 | 12.43 (8.99, 15.86) | 1.07 | <0.001 | 9.30 (6.45, 12.15) | 0.892 | <0.001 |  |
| 48h | 128.14 ± 3.64 | 126.26 ± 2.61 | 118.68 ± 2.71 | 1.82 (-1.24, 4.87) | 0.956 | 1 | 9.65 (6.44, 12.85) | 1.00 | <0.001 | 7.83 (5.41, 10.26) | 0.758 | <0.001 |  |
| 72h | 132.38 ± 3.18 | 131.64 ± 2.63 | 129.71 ± 3.29 | 0.78 (-1.74, 3.29) | 0.786 | 1 | 2.72 (-0.13, 5.57) | 0.892 | 0.083 | 1.94 (-0.62, 4.50) | 0.801 | 0.548 |  |

*Values are presented as mean ± standard deviation.*

*a: P-value adjusted by Bonferroni method.*

*b: QoR-15 scores were adjusted for surgery type in the analysis.*

*Comparisons were analyzed using generalized estimating equations (GEE). Working Correlation Matrix is Independent.*

*Abbreviations: CI: Confidence Interval; MD: Mean Difference; QoR-15, Quality of Recovery-15.*


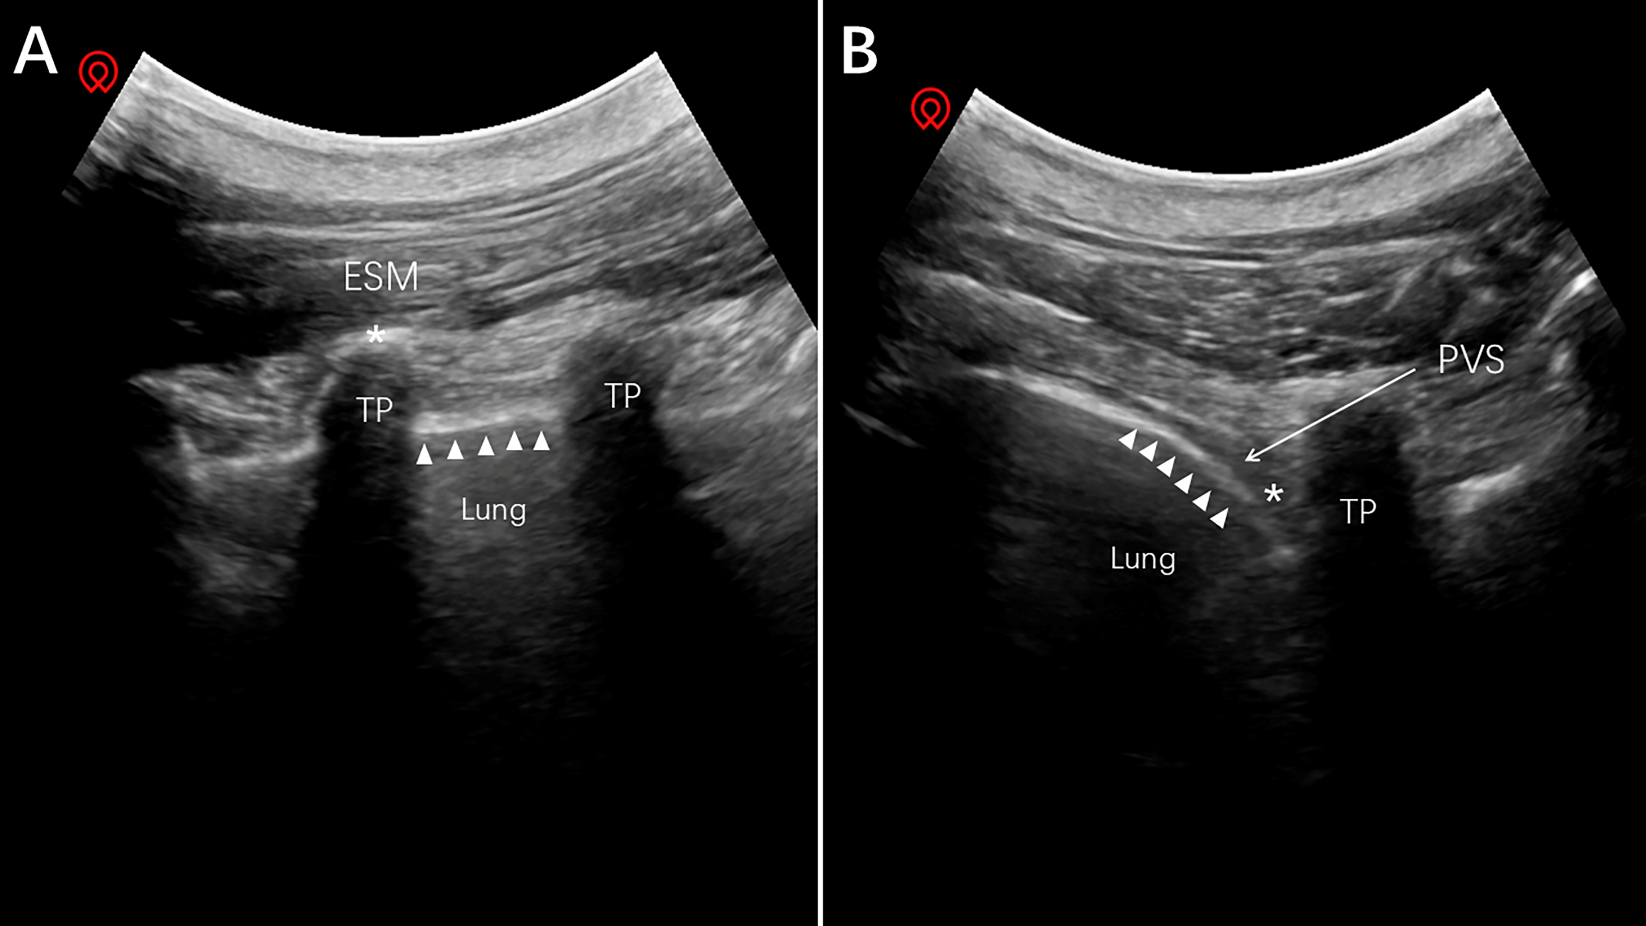


Fig. S1 Ultrasound Imaging and Puncture Site Location for Erector Spinae Plane Block and Paravertebral Nerve Block. A: Ultrasound-guided erector spinae plane block; B: Ultrasound-guided thoracic paravertebral block; *: Target puncture point; White triangle: Pleura (indicated by the triangle); Lung: Lung; ESM: Erector Spinae Muscle; PVS: Paravertebral Space; TP: Transverse Process.
